1 **Roosting in exposed microsites by a nocturnal bird, the rufous-cheeked nightjar:**  
2 **implications for water balance under current and future climate conditions**

3

4 Ryan S. O'Connor

5 *DST-NRF Centre of Excellence at the Percy FitzPatrick Institute, Department of Zoology and*

6 *Entomology, University of Pretoria, Private Bag X20, Hatfield 0028, South Africa.*

7 *Email: [orconn163@gmail.com](mailto:orconn163@gmail.com)*

8

9 R. Mark Brigham

10 *Department of Biology, University of Regina, Regina, Saskatchewan S4S 0A2, Canada.*

11 *Email: [Mark.Brigham@uregina.ca](mailto:Mark.Brigham@uregina.ca).*

12

13 Andrew E. McKechnie\*

14 *DST-NRF Centre of Excellence at the Percy FitzPatrick Institute, Department of Zoology and*

15 *Entomology, University of Pretoria, Private Bag X20, Hatfield 0028, South Africa.*

16 *South African Research Chair in Conservation Physiology, National Zoological Gardens of*

17 *South Africa, P.O. Box 754, Pretoria 0001, South Africa.*

18 *Email: [aemckechnie@zoology.up.ac.za](mailto:aemckechnie@zoology.up.ac.za).*

19

20 \* Author for correspondence

21 **Abstract**

22 Nocturnally active birds roosting in exposed diurnal microsites with intense solar radiation can  
23 experience operative temperatures ( $T_e$ ) that markedly differ from air temperature ( $T_a$ ).  
24 Quantifying  $T_e$  thus becomes important for accurately modeling energy and water balance. We  
25 measured  $T_e$  at roost and nest sites used by Rufous-cheeked Nightjars (*Caprimulgus rufigena*)  
26 with three-dimensionally printed biophysical models covered with the integument and plumage  
27 of a bird. Additionally, we estimated site-specific diurnal water requirements for evaporative  
28 cooling by integrating  $T_e$  and  $T_a$  profiles with evaporative water loss (EWL) data for Rufous-  
29 cheeked Nightjars. Between 12:00 and 15:00 hrs, average  $T_e$  at roost sites varied from 33.1 to  
30 49.9 °C, whereas at the single nest site  $T_e$  averaged 51.4 °C. Average diurnal EWL, estimated  
31 using  $T_e$ , was as high as 10.5 and 11.3 g at roost and nest sites, respectively, estimates 3.8- and  
32 4.0-fold greater, respectively, than when calculated with  $T_a$  profiles. These data illustrate that  
33 under current climatic conditions, Rufous-cheeked Nightjars can experience EWL potentially  
34 approaching their limits of dehydration tolerance. In the absence of microsite changes, climate  
35 change during the 21<sup>st</sup> century could perhaps create thermal conditions under which Rufous-  
36 cheeked Nightjars exceed dehydration tolerance limits before the onset of their nocturnal active  
37 phase.

38 **Keywords:** *Microclimate, evaporative cooling, biophysical ecology, operative temperature,*  
39 *Caprimulgus rufigena, Rufous-cheeked Nightjar*

## 40 **Introduction**

41 Organisms frequently experience the thermal environment at fine spatial scales, typically relative  
42 to their body size, resulting in microclimates that substantially differ from coarse regional  
43 macroclimates derived from standardized weather data (Beckman et al. 1973, Campbell and  
44 Norman 1998, Potter et al. 2013). An organisms immediate thermal environment arises from a  
45 complex suite of interacting abiotic variables, including solar and thermal radiation, air  
46 temperature ( $T_a$ ), wind speed, surface temperature and humidity (Porter and Gates 1969, Bakken  
47 1976, Bakken 1989). Due to the fine scale at which microclimates occur, animals occupying the  
48 same habitat can simultaneously experience a thermally diverse range of microclimates (Sears et  
49 al. 2011), leading to large variation among individuals in energy and water demands.  
50 Behaviorally, animals may control their rate of heat loss or gain through postural changes (Porter  
51 et al. 1994) and/or by occupying thermally-buffered refugia (Wolf et al. 1996, Scheffers et al.  
52 2014). Additionally, endotherms may temporarily abandon normothermic  $T_b$  by expressing  
53 patterns of thermoregulation that lead to energy and water conservation (e.g., facultative  
54 hypothermia or hyperthermia; McKechnie and Lovegrove 2002, Tieleman and Williams 1999),  
55 conditions under which microhabitat selection will have a large influence on energy and/or water  
56 savings. A thorough understanding of the microclimates an individual experiences within its  
57 habitat is thus a prerequisite for predicting energy and water requirements under current and  
58 future climates (Kearney and Porter 2009, Porter et al. 2010).

59 Operative temperature ( $T_e$ ), the temperature of an animal model in thermodynamic  
60 equilibrium with its environment in the absence of metabolic heating or evaporative cooling  
61 (Bakken 1976), is commonly used to quantify microclimates at spatial scales relevant to an  
62 animal (Bakken 1992, Dzialowski 2005). Operative temperature can be measured using either

63 mathematical, statistical or biophysical models (Bakken 1992, Angilletta 2009). Biophysical  
64 models traditionally consist of a thin copper cast electroformed to match the size and shape of  
65 the focal animal and, in the case of ectotherms that lack pelages, painted to match the  
66 absorptivity of the focal species (Bakken and Gates 1975, Dzialowski 2005). For thermal  
67 investigations of endotherms, the skin and pelage of the animal of interest is typically wrapped  
68 around the cast to incorporate the thermal properties of fur or feathers (e.g., Ward and Pinshow  
69 1995, Bozinovic et al. 2000, Tieleman and Williams 2002). Hence, biophysical models integrate  
70 the abiotic factors of the thermal environment (i.e., radiation,  $T_a$ , wind speed and surface  
71 temperature) with an animal's physical attributes (i.e., size, shape and color) to determine the  $T_e$   
72 experienced in a particular microsite (Bakken and Angilletta 2014).

73 Nightjars and nighthawks (Caprimulgidae) are a nocturnally active avian taxon that  
74 generally roost and nest on the ground during their diurnal rest phase. Several species have been  
75 reported occupying sites devoid of shade and continuously subjected to intense solar radiation,  
76 even in midsummer (e.g., Cowles and Dawson 1951, Bartholomew et al. 1962, Steyn 1971,  
77 Grant 1982, Cleere and Nurney 1998). Moreover, forced convective heat loss at these sites is  
78 likely minimal due to reduced wind speeds at ground level (Chen et al. 1998). Caprimulgids,  
79 therefore, can experience microclimates wherein  $T_e$  peaks at 50 - 60 °C (Weller 1958, Grant  
80 1982, Ingels et al. 1984). Under such extreme heat, caprimulgids must elevate evaporative water  
81 loss (EWL) above baseline levels for prolonged periods to avoid lethal hyperthermia (Grant  
82 1982, O'Connor et al. 2017b).

83 Our objectives were to characterize the microclimates of roost and nest sites for a  
84 southern African arid-zone caprimulgid, the Rufous-cheeked Nightjar (*Caprimulgus rufigena*).  
85 Like many other nightjars, Rufous-cheeked Nightjars may select roost and/or nest sites with

86 partial or no shading, even in mid-summer (R.S. O'Connor personal observation, Cleere and  
87 Nurney 1998). No attempts, however, have been made to quantify the range of  $T_e$  values that  
88 Rufous-cheeked Nightjars experience in the field, despite the importance of these data for  
89 understanding their water budgets. We used two types of three dimensionally (3-D) printed  
90 biophysical models to measure  $T_e$  at roost and nest sites, one consisting of a 3-D printed plastic  
91 body (hereafter  $T_{e\text{-plastic}}$ ) and the second type a plastic body covered with the skin and feathers of  
92 a Rufous-cheeked Nightjar (hereafter  $T_{e\text{-skin}}$ ). We also integrated  $T_e$  and  $T_a$  profiles measured at  
93 each site with EWL data derived from a laboratory heat tolerance investigation for this species  
94 (O'Connor et al. 2017b) to predict site-specific water requirements for evaporative cooling  
95 during the diurnal inactive period.

96

## 97 **Methods**

### 98 *Roost and nest location*

99 We quantified  $T_e$  at six roost sites and one nest site used by six Rufous-cheeked Nightjars (two  
100 roost sites were used by the same individual) between 26 October and 12 December 2015 at  
101 Dronfield Nature Reserve (28° 39' S, 24° 48' E, ~1218 m a.s.l.) near Kimberley, South Africa.  
102 Nightjars were captured at night on roads with a handheld net and spotlight. Upon capture, we  
103 fitted nightjars with a radio transmitter (BD-2T, Holohil Systems, Carp, Ontario, Canada)  
104 positioned between the scapulars using a backpack-style harness built from Teflon ribbon  
105 (Telonics, Mesa, AZ, USA). Additionally, we injected a passive-integrated transponder (PIT) tag  
106 (Biomark, Boise, ID, USA) into the peritoneal cavity to register  $T_b$  of incubating adults as part of  
107 a separate thermoregulation study (O'Connor et al. 2017a). Birds were released immediately  
108 after transmitters were attached and PIT tags injected. We tracked birds to their roost sites using

109 telemetry. Once a site was located, we recorded the latitude and longitude and marked the  
110 location with a metal stake for eventual placement of our models. On average, models were set  
111 up 3.5 days after discovering a roost location. For the nest site, we waited until incubation was  
112 complete before placing our models.

113

#### 114 *Biophysical model construction and $T_e$ measurements*

115 We followed Watson and Francis (2015) and used 3-D printed models to measure  $T_e$ . These  
116 authors compared  $T_e$  values of 3-D printed models to those recorded using traditional  
117 electroformed copper models and found that  $T_e$  distributions of the two model types were  
118 generally similar when placed in identical habitats. Furthermore, Watson and Francis (2015)  
119 reported no substantial differences in the response of models to radiant heat or varying  $T_a$ .  
120 Finally, 3-D printed models are more anatomically accurate and easier to produce than traditional  
121 electroformed copper models, and hence are a good substitute for measuring  $T_e$  (Watson and  
122 Francis 2015).

123 We constructed four 3-D printed biophysical models, consisting of two  $T_{e\text{-skin}}$  models and  
124 two  $T_{e\text{-plastic}}$  models. To construct our  $T_{e\text{-plastic}}$  models, we took a series of 49 pictures at 90° and  
125 45° angles encompassing 360° of a deceased Rufous-cheeked Nightjar (Supplementary Material  
126 A, Figure S1). These photos were uploaded to 123d Catch (<http://www.123dapp.com/catch>)  
127 which automatically stitched them into a 3-D model. Because we were unable to capture photos  
128 of the bird's ventral surface during this procedure, we used Blender v. 2.75  
129 (<https://www.blender.org/>) to manually impose a plane to the underside of each model. The  
130 digital 3-D model was then scaled using Cura (<https://ultimaker.com/en/products/cura-software>)  
131 and saved as an .stl file and emailed to 3DForms (Johannesburg, South Africa,

132 <http://www.3dforms.co.za/>) for printing. The  $T_{e\text{-plastic}}$  models were printed using Makerbot's  
133 (Makerbot Industries LLC, Brooklyn, NY, USA) cool grey acrylonitrile butadiene styrene (ABS)  
134 filament with a 0% fill and an approximately 2-mm thick shell. The final  $T_{e\text{-plastic}}$  models were  
135 smoothed post printing, and measured approximately 225 mm from tip of bill to tail, 44 mm  
136 from top of head to base and 53 mm wide. The  $T_{e\text{-plastic}}$  models were printed with a removable lid  
137 on the base, which we secured with adhesive prior to model deployment (Supplementary  
138 Material A, Figure S2). A type-T thermocouple (Omega, Norwalk, CT, USA) was inserted  
139 through a hole drilled in the base of each model and sealed in place with an adhesive. The tip of  
140 the thermocouple was centered horizontally and vertically within the model to avoid any effects  
141 of thermal stratification (Bakken 1992; Supplementary Material A, Figure S2). Prior to  
142 deployment, thermocouples were calibrated in a water bath between 5 and 50 °C in 5 °C  
143 increments against a mercury thermometer traceable to the US National Bureau of Standards.

144 To construct our  $T_{e\text{-skin}}$  models, we provided two Rufous-cheeked Nightjar carcasses to a  
145 taxidermist who separated the skin from the bodies. We took 32 pictures in series of a skinned  
146 body, again encompassing 360° and taken at 90° and 45° angles (Supplementary Material A,  
147 Figure S3). These photos were compiled, scaled and printed using the same software and plastic  
148 as outlined above. We scaled these models based on measurements provided by the taxidermist,  
149 with the final dimensions of the body measuring approximately 39.5 mm long x 14 mm wide x  
150 23.4 mm high. Due to the smaller size of these models, they had to be printed in halves and then  
151 glued together. Consequently, some tiny gaps remained on the models and we sealed these using  
152 plaster-of-Paris and a cyanoacrylate adhesive (Supplementary Material A, Figure S4). We  
153 ensured models were airtight by completely submerging them in water to observe if any escaping  
154 air bubbles formed. We inserted a type-T thermocouple (Omega, Norwalk, CT, USA) into the

155 approximate center of each model through a hole drilled in the ventral surface. Thermocouples  
156 were sealed in place and calibrated prior to placement as described for the  $T_{e\text{-plastic}}$  models above.  
157 The final plastic bodies were then returned to the taxidermist who wrapped them in the skin to  
158 create the complete  $T_{e\text{-skin}}$  models. Because the smoothing process left the 3-D printed plastic  
159 bodies slippery, the taxidermist had to wrap a ~5-mm layer of cotton wool around the bodies to  
160 increase adhesion between the skin and the plastic (Supplementary Material A, Figure S5).

161 Both  $T_{e\text{-skin}}$  and  $T_{e\text{-plastic}}$  models were placed side by side at a specific site (Supplementary  
162 Material A, Figure S6) either in the morning (mean placement time = 07:48) or at night (mean  
163 placement time = 19:12). Models were first placed facing true north, whereafter we alternated the  
164 cardinal direction approximately every 24 hours (mean time in each direction = 22.9 hours), with  
165 the models positioned in every cardinal direction before relocation to a new site. Therefore, the  
166 mean time models remained at a site was approximately 4 days (mean time at a site = 3.8 days).  
167 We recorded  $T_{e\text{-skin}}$  and  $T_{e\text{-plastic}}$  values simultaneously every minute using a 4-channel  
168 thermocouple data logger (model SD-947, Reed Instruments, Wilmington, NC, USA). We buried  
169 the thermocouple wiring between the models and logger in the sand to prevent heat from solar  
170 radiation conducting along the wire (Bakken 1992). Operative temperature data were transferred  
171 onto a personal computer every time we changed the direction of the models. Weather data were  
172 recorded every minute with a portable weather station (Vantage Pro2, Davis Instruments,  
173 Hayward, CA, USA), placed ~2.0 m above the ground and calibrated as described by Smit et al.  
174 (2013).

175

176 *Data analysis*



177 All analyses were conducted in R v. 3.4.0 (R Core Team 2017) with values presented as mean  $\pm$   
178 standard deviation (SD). We categorized the data into three periods, namely diurnal (i.e., sunrise  
179 to sunset), midday (i.e., 12:00 – 15:00 hours) and nocturnal (i.e., sunset to sunrise). Sunrise and  
180 sunset times were calculated using the R package *maptools* (Bivand and Lewin-Koh 2017). We  
181 compared overall differences among  $T_{e\text{-skin}}$  and  $T_{e\text{-plastic}}$  models for all sites combined during the  
182 diurnal period by fitting a linear mixed-effect model using the R package *lme4* (Bates et al.  
183 2015), with  $T_e$  a continuous response variable and *skin* a two-level categorical predictor. We  
184 included  $T_e$  model as a random factor because of repeated  $T_e$  measurements within the same  
185 model. We report the effect size *skin* had on  $T_e$ , represented as the parameter estimate ( $\beta \pm$  SD)  
186 and the associated 95% confidence interval (95% CI). We considered the mean difference  
187 between  $T_{e\text{-skin}}$  and  $T_{e\text{-plastic}}$  models to be statistically significant if the 95% CI did not overlap  
188 zero. We then analyzed diel patterns in  $T_{e\text{-skin}}$  and  $T_a$  at each site by aggregating all values  
189 recorded each minute during a recording period and taking the average. For example, mean  $T_{e\text{-}}$   
190  $_{\text{skin}}$  at 12:00 hours within a site represents the average of all  $T_{e\text{-skin}}$  values recorded at 12:00 hours  
191 at that site over the entire recording period. Because there were occasional gaps in our  
192 temperature recordings (e.g., when changing position of the models), not every minute was  
193 represented for every day and consequently sample sizes for each minute ranged from 1 to 5. To  
194 determine when and for how long  $T_{e\text{-skin}}$  exceeded free-ranging modal body temperature ( $T_{b\text{-mod}}$ ),  
195 we isolated all diurnal  $T_e$  values  $> 39.7$  °C at roost sites and all  $T_e$  values  $> 38.8$  °C at the nest site  
196 (O'Connor et al. 2017a). We additionally calculated the direction and magnitude that  $T_{e\text{-skin}}$   
197 deviated from free-ranging  $T_{b\text{-mod}}$  at each site during the diurnal and midday periods by  
198 subtracting  $T_{b\text{-mod}}$  from each  $T_{e\text{-skin}}$  value (i.e.,  $\Delta T_e - T_{b\text{-mod}}$ ). Overall roost site averages represent  
199 the combined average from each individual roost site average.

200 To estimate site-specific diurnal EWL during a recording period, we integrated  $T_e$  and  $T_a$   
201 traces with the EWL data reported by O'Connor et al. (2017b). We used free-ranging  $T_{b-mod}$  for  
202 roosting birds (i.e., 39.7 °C; O'Connor et al. 2017a) as an inflection point at roost sites and the  
203  $T_{b-mod}$  of an incubating Rufous-cheeked Nightjar (i.e., 38.8 °C; O'Connor et al. 2017a) as an  
204 inflection point at the nest site. At  $T_a$  and  $T_e \leq T_{b-mod}$ , we predicted EWL assuming  $EWL (g\ hr^{-1})$   
205  $= 0.007x + 0.002$ , and at  $T_a$  and  $T_e > T_{b-mod}$  we assumed  $EWL (g\ hr^{-1}) = 0.099x - 3.610$ , where  $x$   
206 represents either  $T_e$  or  $T_a$ . For all  $T_e$  calculations we used  $T_{e-skin}$  values. We calculated a mean  
207 EWL estimate for each minute over a 24-hour period by aggregating all values at each minute as  
208 described above for the diel  $T_{e-skin}$  and  $T_a$  calculations. We then summed all mean EWL  
209 predictions for each minute between sunrise and sunset to obtain the total average amount of  
210 water lost during just the diurnal period at a given site. We expressed total EWL during the  
211 diurnal period as a percentage of body mass ( $M_b$ ) assuming an average  $M_b$  of 57.1 g, which was  
212 the average  $M_b$  of birds at capture when being weighed for a total body water study (O'Connor et  
213 al. *unpublished data*).

214

## 215 **Results**

216 We recorded 36,648  $T_e$  values for each model type. Except for a single roost situated under a  
217 camelthorn (*Vachellia erioloba*) tree, and thus shaded for most of the day, all roost sites were  
218 partially shaded and experienced periods of full solar exposure throughout the day. In contrast,  
219 the nest site was completely exposed and hence continuously subjected to intense solar radiation.  
220 Average diurnal  $T_a$  across sites during the study period was  $28.0 \pm 2.8$  °C and average solar  
221 radiation level was  $544.5 \pm 37.3$  W m<sup>-2</sup>. Within each site, mean  $T_{e-skin}$  values were generally  
222 similar to those of  $T_{e-plastic}$  during both the diurnal and midday periods (Table 1). On average,

223 mean  $T_{e\text{-plastic}}$  values were  $0.9 \pm 2.0$  °C greater than  $T_{e\text{-skin}}$  values during the diurnal period and  
224  $0.2 \pm 0.6$  °C greater during the midday period (Table 1). In contrast, differences between mean  
225 maximum  $T_e$  within sites were larger (Table 1), with mean maximum  $T_{e\text{-plastic}}$  values  $3.4 \pm 3.7$  °C  
226 greater than mean  $T_{e\text{-skin}}$  values. The overall difference between  $T_{e\text{-skin}}$  and  $T_{e\text{-plastic}}$  models during  
227 the diurnal period for all sites combined was not significant (skin  $\beta = -0.920 \pm 3.48$  °C, 95% CI =  
228  $-8.14$  °C,  $5.93$  °C), with mean  $T_{e\text{-skin}} = 36.3 \pm 10.8$  °C and mean  $T_{e\text{-plastic}} = 37.3 \pm 11.5$  °C.

229 During the nocturnal period,  $T_e$  did not deviate far from  $T_a$  at roost sites or the nest site  
230 (Figure 2 and Figure 3). For example, the mean difference between  $T_{e\text{-skin}}$  and  $T_a$  during the  
231 nocturnal period at roost and nest sites combined was  $0.6 \pm 2.3$  °C (range =  $-6.8 - 8.8$  °C).  
232 Beginning at sunrise, however,  $T_e$  increased rapidly to values far above  $T_a$  (Figure 2 and Figure  
233 3). Except for at roosts 3 and 5, mean  $T_{e\text{-skin}}$  exceeded free-ranging  $T_{b\text{-mod}}$  for extended periods  
234 (Figure 2). On average,  $T_{e\text{-skin}}$  from roost sites exceeded  $T_{b\text{-mod}}$  by 08:27 h (range = 08:12 – 08:41  
235 h; Figure 2). The overall average duration that  $T_{e\text{-skin}}$  exceeded  $T_{b\text{-mod}}$  during the diurnal period at  
236 roost sites was 6.8 hours (range = 4.6 – 7.9 hours; Figure 2). During this time, overall mean  $T_{e\text{-}}$   
237  $_{\text{skin}} = 43.6 \pm 3.5$  °C (range = 39.9 – 48.9 °C) while the overall average  $T_a = 33.2 \pm 3.5$  °C (range =  
238 28.1 – 38.0 °C). During the midday period, mean  $\Delta T_e - T_{b\text{-mod}}$  among roost sites ranged from –  
239  $6.6 \pm 3.3$  to  $10.2 \pm 7.6$  °C (Figure 4).

240 Mean total diurnal EWL estimated based on  $T_{e\text{-skin}}$  ranged from 2.8 – 10.5 g among roost  
241 sites, with evaporative water requirements being 1.2 – 3.8-fold greater when calculated using  $T_e$   
242 compared with estimates based on  $T_a$  (Figure 5). Expressed as a percentage of  $M_b$ , total diurnal  
243 EWL among roost sites ranged from 4.9 – 18.4% of  $M_b$ .

244 At the nest site, mean  $T_{e\text{-skin}}$  exceeded incubating  $T_{b\text{-mod}}$  by 09:33 and did not decrease  
245 below  $T_{b\text{-mod}}$  until 18:20 (~8.75 hours; Figure 3). During this period,  $T_{e\text{-skin}}$  averaged  $48.0 \pm 4.0$

246 °C (range = 38.9 – 53.4 °C), while average  $T_a = 31.3 \pm 1.7$  °C (range = 26.6 – 33.5 °C). The  
247 average  $\Delta T_e - T_{b-mod}$  during the midday period at the nest site was  $12.6 \pm 4.2$  °C (Figure 4).  
248 Diurnal evaporative water requirements at the nest site were 11.3 g when estimated from  $T_{e-skin}$ , a  
249 value 4-fold greater than when estimated using  $T_a$  values (Figure 6). Total estimated diurnal  
250 water loss at the nest site was equivalent to 19.8% of  $M_b$ .

251

## 252 **Discussion**

253 We show that Rufous-cheeked Nightjars regularly experienced microclimates where  $T_e$   
254 substantially exceeded free-ranging  $T_b$  (O'Connor et al 2017a). The high environmental  
255 temperatures reported here are consistent with those reported by previous authors who  
256 characterized the diurnal thermal environments occupied by nightjars and other thermally  
257 exposed birds (e.g., Weller 1958, Bartholomew and Dawson 1979, Grant 1982, Tieleman and  
258 Williams 2002, Amat and Masero 2004a, Carroll et al. 2015a). Our data further underscore the  
259 significant contribution that solar radiation can have on the total heat load of an animal and that  
260  $T_a$  alone typically provides only a minimum index of a terrestrial animal's thermal stress in hot  
261 environments (Porter and Gates 1969, Sears et al. 2011). This is exemplified by the fact that  
262 maximum  $T_a$  exceeded 38 °C on just 3 days during our recording period whereas maximum  $T_e$   
263 exceeded 38 °C on 27 days.

264 We did not find significant differences in average diurnal  $T_e$  measurements among our  $T_{e-}$   
265  $_{skin}$  and  $T_{e-plastic}$  models. In a similar study, Walsberg and Weathers (1986) compared  $T_e$  values  
266 from copper taxidermic mounts covered with the integument of four bird species to  $T_e$  values  
267 recorded from painted metal spheres. When averaged over a 5-day period, Walsberg and  
268 Weathers (1986) found that mean differences among the models were less than 2.0 °C. However,

269 Walsberg and Weathers (1986) noted that when  $T_e$  was averaged over time scales of less than  
270 several hours, differences between models reached up to 6.3 °C. Indeed, this likely explains the  
271 larger differences we observed among our models for mean maximum  $T_e$  because these averages  
272 were derived from single point estimates as opposed to data spanning more than several hours.  
273 Hence, our findings support the conclusion reached by Walsberg and Weathers (1986) that  
274 complex  $T_e$  models may not always be necessary, as long as numerous data are collected over  
275 extended periods. Likewise, Bakken (1992) suggested that in some instances, a rough  
276 approximate representation of the study animal can be adequate and the appropriate  $T_e$  model  
277 used will depend on the relative importance of several considerations, such as field conditions or  
278 the study's objective. However, investigators should attempt to use models with physical  
279 properties matching those of a study animal whenever possible (Bakken 1992, Bakken and  
280 Angilletta 2014).

281 Our data show that predicted diurnal water requirements can be several-fold greater when  
282 calculated using  $T_e$  compared to  $T_a$ , reiterating the importance of using spatially relevant  
283 microclimates when assessing an animal's physiological stress (Huey 1991, Helmuth et al. 2010,  
284 Porter et al. 2010). Moreover, the amount of water lost based on  $T_e$  values was equivalent to a  
285 substantial percentage of  $M_b$ , suggesting that, on hot, cloudless days, Rufous-cheeked Nightjars  
286 might be approaching their limits of dehydration tolerance. Unfortunately, few data exist on  
287 acute dehydration tolerance among birds when exposed to severe heat stress over time scales of  
288 hours on very hot days (Wolf 2000, McKechnie and Wolf 2010, Albright et al. 2017). Wolf and  
289 Walsberg (1996), however, reported acute dehydration tolerance limits in Verdins (*Auriparus*  
290 *flaviceps*; ~7 g) when water loss exceeded 11% of  $M_b$ , a physiological threshold far lower than  
291 the maximum water losses predicted here. An important factor known to enhance dehydration

292 tolerance among birds and mammals is the ability to conserve plasma volume (Horowitz and  
293 Borut 1970, Arad et al. 1989, Carmi et al. 1993). However, plasma volume conservation is  
294 apparently affected by the  $T_a$  at which dehydration occurs (Carmi et al. 1994). Carmi et al.  
295 (1994), for example, found that Rock Pigeons (*Columbia livia*) could maintain plasma volume at  
296  $T_a$  of 36 °C for ~32 hours but, when exposed to  $T_a$  of 40 °C for ~28 hours, plasma volume  
297 decreased by 8.9%, despite similar total losses in water between the  $T_a$  groups. To our  
298 knowledge, there are no data on whether caprimulgids conserve plasma volume during acute heat  
299 stress, but we speculate that Rufous-cheeked Nightjars and relatives have evolved mechanisms  
300 increasing permeability for osmotic diffusion between the extracellular and intracellular  
301 compartments, thereby aiding plasma volume conservation and allowing them to tolerate  
302 prolonged periods of high EWL.

303         Despite a large rapid depletion of body water during the diurnal rest phase, we predict that  
304 Rufous-cheeked Nightjars with a mean  $M_b$  of 57.1 g can periodically replenish body water by  
305 obtaining a maximum of 10.3 g H<sub>2</sub>O through preformed and metabolic water (Supplementary  
306 Material B). However, the temporal window for nightjars to forage is highly variable and  
307 constrained by several ecological and environmental factors (Mills 1986, Jetz et al. 2003,  
308 Ashdown and McKechnie 2008, Woods and Brigham 2008). Consequently, nightjars may not  
309 always acquire enough insects to offset EWL, increasing their dependence on drinking water.  
310 Indeed, on multiple occasions at dusk we observed Rufous-cheeked Nightjars drinking on the  
311 wing at water reservoirs near roost and nest sites. Furthermore, assuming a proportional increase  
312 in  $T_e$  with the projected 4 °C increase in  $T_a$  during the 21<sup>st</sup> century (Smith et al. 2011), maximum  
313 predicted water requirements at roost and nest sites for Rufous-cheeked Nightjars at Dronfield  
314 could reach values of 13.8 and 15.1 g, respectively, equivalent to 24.2 and 26.4% of  $M_b$ .

315 Presumably, nightjar populations with no access to drinking water will be highly vulnerable to  
316 climate change because of the increasing difficulty of offsetting water deficits solely through  
317 preformed and metabolic water.

318         Given the design and construction of our  $T_e$  models, it is possible that multiple sources of  
319 error were introduced in our  $T_e$  estimates. Firstly, the size difference between our 3-D printed  
320 bodies could have created issues with thermal stratification (Bakken 1992, O'Connor et al. 2000,  
321 Bakken and Angilletta 2014). However, the generally small size of our models (< 100 g)  
322 combined with the thickness of the plastic (~2 mm) and the placement of the thermocouples  
323 likely mitigated this issue (Bakken 1992). The second potential source of error stems from the  
324 layer of cotton wool wrapped around the plastic body of our  $T_{e\text{-skin}}$  models. This cotton added an  
325 insulative layer which likely increased the time constant of our models. Bakken (1992) and  
326 O'Connor (2000) proposed that the time constant desired ultimately depends on the study  
327 question and rapid time responses are plausibly more important in studies on animals where  
328 behavioral thermoregulation is paramount (e.g., ectotherms). Because nightjars are inactive  
329 during the day, behavioral thermoregulation is minimal, aside from postural adjustments, and an  
330 instantaneous time constant may not be as imperative. In any event, because we lacked the  
331 necessary equipment (e.g., wind tunnel and solar simulator), we could not accurately calibrate  
332 our models prior to use, an issue that appears to be common among operative temperature studies  
333 (Walsberg and Wolf 1996, Dzialowski 2005).

334

### 335 **Conclusions**

336 One of the most pressing issues facing biologists today is predicting how organisms will respond  
337 to climate change (Schwenk et al. 2009, Sears and Angilletta 2011). A vital step towards

338 addressing this issue is knowing the degree to which an organism is exposed to environmental  
339 change (Williams et al. 2008). Organismal exposure, however, will be mediated through  
340 microhabitat selection and the use of microrefugia which can substantially buffer or amplify an  
341 environmental signal (e.g., Woods et al. 2015, Morelli et al. 2016, Pincebourde et al. 2016,  
342 Lenoir et al. 2017). Hence, organisms usually experience microclimates at spatial scales much  
343 finer than those recorded at gridded weather stations (Campbell and Norman 1998, Helmuth et  
344 al. 2010). An understanding of the thermal heterogeneity an organism is exposed to across its  
345 range of microclimates is necessary when assessing its physiological stress under current and  
346 future climate conditions.

347       During our study, Rufous-cheeked Nightjars experienced microclimates where  $T_e$   
348 substantially exceeded normothermic  $T_b$  for periods of several hours each day. Although  
349 diurnally active birds may also experience similarly high environmental temperatures when  
350 foraging, they also can periodically escape midday heat by seeking out shaded microhabitats  
351 with more moderate microclimates (Goldstein 1984, Carroll et al. 2015b, Pattinson and Smit  
352 2017). Hence, diurnal birds can reduce rates of EWL through behavioral thermoregulation  
353 (Williams et al. 1999, Wolf 2000). In contrast, nightjars remain inactive and experience the full  
354 brunt of the sun, resulting in large evaporative water requirements (Grant 1982). The capacity for  
355 nightjars to tolerate high heat loads stems from a combination of a low resting metabolic rate and  
356 an energetically efficient mechanism for dissipating heat (Dawson and Fisher 1969, O'Connor et  
357 al. 2017b, Talbot et al. 2017). Both of these traits serve to reduce an individual's total heat load  
358 by minimizing endogenous heat production. Several authors have suggested that the use of  
359 exposed sites by ground nesting species presents a trade-off between lower predation risk due to  
360 early predator detection and increased heat stress (Amat and Masero 2004b, Tieleman et al.



361 2008). However, increasing temperatures could alter the dynamics of this trade-off, possibly  
362 forcing nightjars to use more shaded microhabitats despite greater predation risk. Our EWL  
363 estimates based on  $T_e$  values suggest that Rufous-cheeked Nightjars require exceedingly high  
364 EWL rates. The physiological mechanisms allowing nightjars to tolerate large losses in body  
365 water are presently unknown, but could pertain to an increased capacity to maintain plasma  
366 volume. Additionally, free-ranging Rufous-cheeked Nightjars likely conserve water through  
367 facultative hyperthermia (O'Connor et al. 2017a). Under current thermal conditions, Rufous-  
368 cheeked Nightjars can apparently offset evaporative water losses with preformed water from  
369 their diet and metabolic water. Climate change, however, will likely increase evaporative water  
370 requirements, in turn increasing the importance of drinking water and, possibly, even resulting in  
371 conditions where nightjars cannot make it to sunset without becoming lethally dehydrated.

372

### 373 **Acknowledgements**

374 We sincerely thank Alex Mullinos at 3dforms for his patience and help with 3-D printing and Dr.  
375 James Meyer for performing the taxidermy necessary to complete the models. Without their  
376 assistance, this study would not have been possible. We additionally thank Duncan MacFadyen  
377 and E. Oppenheimer & Son for granting us access to their property. Cathy Bester and all field  
378 assistants provided invaluable help during the field season. Lastly, Bruce Woodroffe and  
379 Awesome Tools (Cape Town, South Africa) provided discounted lighting equipment, for which  
380 we are greatly appreciative.

381 **References**

- 382 Albright, T.P., Mutiibwa, D., Gerson, A.R., Smith, E.K., Talbot, W.A., O'Neill, J.J., McKechnie,  
383 A.E., and Wolf, B.O. 2017. Mapping evaporative water loss in desert passerines reveals an  
384 expanding threat of lethal dehydration. *Proc. Natl. Acad. Sci.* **114**(9): 2283–2288.  
385 doi:10.1073/pnas.1613625114.
- 386 Amat, J.A., and Masero, J.A. 2004a. How Kentish plovers, *Charadrius alexandrinus*, cope with  
387 heat stress during incubation. *Behav. Ecol. Sociobiol.* **56**(1): 26–33. doi:10.1007/s00265-  
388 004-0758-9.
- 389 Amat, J.A., and Masero, J.A. 2004b. Predation risk on incubating adults constrains the choice of  
390 thermally favourable nest sites in a plover. *Anim. Behav.* **67**(2): 293–300.  
391 doi:10.1016/j.anbehav.2003.06.014.
- 392 Arad, Z., Horowitz, M., Eylath, U., and Marder, J. 1989. Osmoregulation and body fluid  
393 compartmentalization in dehydrated heat-exposed pigeons. *Am. J. Physiol.* **257**: R377-  
394 R382.
- 395 Ashdown, R.A.M., and McKechnie, A.E. 2008. Environmental correlates of freckled nightjar  
396 (*Caprimulgus tristigma*) activity in a seasonal, subtropical habitat. *J. Ornithol.* **149**(4): 615–  
397 619. doi:10.1007/s10336-008-0309-7.
- 398 Bakken, G.S. 1976. A heat transfer analysis of animals: unifying concepts and the application of  
399 metabolism chamber data to field ecology. *J. Therm. Biol.* **60**: 337–384.
- 400 Bakken, G.S. 1989. Arboreal perch properties and the operative temperature experienced by  
401 small animals. *Ecology* **70**(4): 922–930.
- 402 Bakken, G.S. 1992. Measurement and application of operative and standard operative  
403 temperatures in ecology. *Am. Zool.* **32**(2): 194–216. doi:10.1093/icb/32.2.194.

- 404 Bakken, G.S., and Angilletta, M.J. 2014. How to avoid errors when quantifying thermal  
405 environments. *Funct. Ecol.* **28**(1): 96–107. doi:10.1111/1365-2435.12149.
- 406 Bartholomew, G.A., and Dawson, W.R. 1979. Thermoregulatory behavior during incubation in  
407 Heermann's gulls. *Physiol. Zool.* **52**(4): 422–437.
- 408 Bartholomew, G.A., Hudson, J.W., and Howell, T.R. 1962. Body temperature, oxygen  
409 consumption, evaporative water loss, and heart rate in the poor-will. *Condor* **64**: 117–125.
- 410 Bates, D., Mächler, M., Bolker, B., and Walker, S. 2015. Fitting linear mixed-effects models  
411 using lme4. *J. Stat. Softw.* **67**(1): 1–48. doi:10.18637/jss.v067.i01.
- 412 Beckman, W.A., Mitchell, J.W., and Porter, W.P. 1973. Thermal model for prediction of a desert  
413 iguana's daily and seasonal behavior. *J. Heat Transfer* **95**(2): 257. doi:10.1115/1.3450037.
- 414 Bivand, R., and Lewin-Koh, N. 2017. maptools: tools for reading and handling spatial objects. R  
415 Package Version 0.9-2. <https://CRAN.R-project.org/package=maptools>.
- 416 Bozinovic, F., Lagos, J.A., Vásquez, R.A., and Kenagy, G. 2000. Time and energy use under  
417 thermoregulatory constraints in a diurnal rodent. *J. Therm. Biol.* **25**(3): 251–256.  
418 doi:10.1016/S0306-4565(99)00031-5.
- 419 Carmi, N., Pinshow, B., and Horowitz, M. 1994. Plasma volume conservation in pigeons: effects  
420 of air temperature during dehydration. *Am. J. Physiol.* **267**: R1449–R1453.
- 421 Carmi, N., Pinshow, B., Horowitz, M., and Bernstein, M.H. 1993. Birds conserve plasma volume  
422 during thermal and flight-incurred dehydration. *Physiol. Zool.* **66**(5): 829–846.
- 423 Carroll, J.M., Davis, C.A., Elmore, R.D., and Fuhlendorf, S.D. 2015a. A ground-nesting  
424 galliform's response to thermal heterogeneity: implications for ground-dwelling birds. *PLoS*  
425 *One* **10**(11): e0143676. doi:10.1371/journal.pone.0143676.
- 426 Carroll, J.M., Davis, C.A., Elmore, R.D., Fuhlendorf, S.D., and Thacker, E.T. 2015b. Thermal

- 427 patterns constrain diurnal behavior of a ground-dwelling bird. *Ecosphere* **6**(11): art222.  
428 doi:10.1890/ES15-00163.1.
- 429 Chen, Y.C., Bundy, D.S., and Hoff, S.J. 1998. Modeling the variation of wind speed with height  
430 for agricultural source pollution control. *Agric. Biosyst. Eng. Publ.* **104**(1B): 1685–1691.
- 431 Cowles, R.B., and Dawson, W.R. 1951. A cooling mechanism of the Texas nighthawk. *Condor*  
432 **53**(1): 19–22.
- 433 Dawson, W.R., and Fisher, C.D. 1969. Responses to temperature by the spotted nightjar  
434 (*Eurostopodus guttatus*). *Condor* **71**(1): 49–53.
- 435 Dzialowski, E.M. 2005. Use of operative temperature and standard operative temperature models  
436 in thermal biology. *J. Therm. Biol.* **30**(4): 317–334. doi:10.1016/j.jtherbio.2005.01.005.
- 437 Goldstein, D.L. 1984. The thermal environment and its constraint on activity of desert quail in  
438 summer. *Auk* **101**(July): 542–550.
- 439 Grant, G.S. 1982. Avian incubation: egg temperature, nest humidity, and behavioral  
440 thermoregulation in a hot environment. *Ornithol. Monogr.* **30**(30): iii-75.  
441 doi:10.2307/40166669.
- 442 Helmuth, B., Broitman, B.R., Yamane, L., Gilman, S.E., Mach, K., Mislan, K.A.S., and Denny,  
443 M.W. 2010. Organismal climatology: analyzing environmental variability at scales relevant  
444 to physiological stress. *J. Exp. Biol.* **213**(6): 995–1003. doi:10.1242/jeb.038463.
- 445 Horowitz, M., and Borut, A. 1970. Effect of acute dehydration on body fluid compartments in  
446 three rodent species, *Rattus norvegicus*, *Acomys cahirinus* and *Meriones crassus*. *Comp.*  
447 *Biochem. Physiol.* **35**: 283–290.
- 448 Huey, R.B. 1991. Physiological consequences of habitat selection. *Am. Nat.* **137**: S91–S115.  
449 doi:10.1086/285141.

- 450 Ingels, J., Ribot, J.H., and de Jong, B.H.J. 1984. Vulnerability of eggs and young of the blackish  
451 nightjar (*Caprimulgus nigrescens*) in Suriname. *Auk* **101**(2): 388–391.
- 452 Jetz, W., Steffen, J., and Linsenmair, K. 2003. Effects of light and prey availability on nocturnal,  
453 lunar and seasonal activity of tropical nightjars. *Oikos* **103**(3): 627–639.  
454 doi:10.1034/j.1600-0706.2003.12856.x.
- 455 Kearney, M., and Porter, W. 2009. Mechanistic niche modelling: combining physiological and  
456 spatial data to predict species' ranges. *Ecol. Lett.* **12**(4): 334–350. doi:10.1111/j.1461-  
457 0248.2008.01277.x.
- 458 Lenoir, J., Hattab, T., and Pierre, G. 2017. Climatic microrefugia under anthropogenic climate  
459 change: implications for species redistribution. *Ecography*. **40**(2): 253–266.  
460 doi:10.1111/ecog.02788.
- 461 McKechnie, A.E., and Lovegrove, B.G. 2002. Avian facultative hypothermic responses: a  
462 review. *Condor* **104**: 705–724. doi:10.1650/0010-5422.
- 463 McKechnie, A.E., and Wolf, B.O. 2010. Climate change increases the likelihood of catastrophic  
464 avian mortality events during extreme heat waves. *Biol. Lett.* **6**(2): 253–6.  
465 doi:10.1098/rsbl.2009.0702.
- 466 Mills, A.M. 1986. The influence of moonlight on the behavior of goatsuckers (Caprimulgidae).  
467 *Auk* **103**(2): 370–378.
- 468 Morelli, T.L., Daly, C., Dobrowski, S.Z., Dulen, D.M., Ebersole, J.L., Jackson, S.T., Lundquist,  
469 J.D., Millar, C.I., Maher, S.P., Monahan, W.B., Nydick, K.R., Redmond, K.T., Sawyer,  
470 S.C., Stock, S., and Beissinger, S.R. 2016. Managing climate change refugia for climate  
471 adaptation. *PLoS One* **11**(8): e0159909. doi:10.1371/journal.pone.0159909.
- 472 O'Connor, M.P., Zimmerman, L.C., Dzialowski, E.M., and Spotila, J.R. 2000. Thick-walled

- 473 physical models improve estimates of operative temperatures for moderate to large-sized  
474 reptiles. *J. Therm. Biol.* **25**(4): 293–304. doi:10.1016/S0306-4565(99)00101-1.
- 475 O'Connor, R.S., Brigham, R.M., and McKechnie, A.E. 2017a. Diurnal body temperature patterns  
476 in free-ranging populations of two southern African arid-zone nightjars. *J. Avian Biol.*  
477 **48**(9): 1195–1204. doi:10.1111/jav.01341.
- 478 O'Connor, R.S., Wolf, B.O., Brigham, R.M., and McKechnie, A.E. 2017b. Avian  
479 thermoregulation in the heat: efficient evaporative cooling in two southern African  
480 nightjars. *J. Comp. Physiol. B* **187**(3): 477–491. doi:10.1007/s00360-016-1047-4.
- 481 Pattinson, N.B., and Smit, B. 2017. Seasonal behavioral responses of an arid-zone passerine in a  
482 hot environment. *Physiol. Behav.* **179**(June): 268–275. doi:10.1016/j.physbeh.2017.06.018.
- 483 Pincebourde, S., Murdock, C.C., Vickers, M., and Sears, M.W. 2016. Fine-scale microclimatic  
484 variation can shape the responses of organisms to global change in both natural and urban  
485 environments. *Integr. Comp. Biol.* **56**(1): 45–61. doi:10.1093/icb/icw016.
- 486 Porter, W.P., and Gates, D.M. 1969. Thermodynamic equilibria of animals with environment.  
487 *Ecol. Monogr.* **39**(3): 227–244.
- 488 Porter, W.P., Munger, J.C., Stewart, W.E., Budaraju, S., and Jaeger, J. 1994. Endotherm  
489 energetics - from a scalable individual-based model to ecological applications. *Aust. J.*  
490 *Zool.* **42**(1): 125. doi:10.1071/ZO9940125.
- 491 Porter, W.P., Ostrowski, S., and Williams, J.B. 2010. Modeling animal landscapes. *Physiol.*  
492 *Biochem. Zool.* **83**(5): 705–712. doi:10.1086/656181.
- 493 Potter, K.A., Woods, H.A., and Pincebourde, S. 2013. Microclimatic challenges in global change  
494 biology. *Glob. Chang. Biol.* **19**(10): 2932–2939. doi:10.1111/gcb.12257.
- 495 Scheffers, B.R., Edwards, D.P., Diesmos, A., Williams, S.E., and Evans, T.A. 2014.

- 496 Microhabitats reduce animal's exposure to climate extremes. *Glob. Chang. Biol.* **20**(2):  
497 495–503. doi:10.1111/gcb.12439.
- 498 Schwenk, K., Padilla, D.K., Bakken, G.S., and Full, R.J. 2009. Grand challenges in organismal  
499 biology. *Integr. Comp. Biol.* **49**(1): 7–14. doi:10.1093/icb/icp034.
- 500 Sears, M.W., and Angilletta, M.J. 2011. Introduction to the Symposium: responses of organisms  
501 to climate change: a synthetic approach to the role of thermal adaptation. *Integr. Comp.*  
502 *Biol.* **51**(5): 662–665. doi:10.1093/icb/icr113.
- 503 Sears, M.W., Raskin, E., and Angilletta, M.J. 2011. The world is not flat: defining relevant  
504 thermal landscapes in the context of climate change. *Integr. Comp. Biol.* **51**(5): 666–675.  
505 doi:10.1093/icb/icr111.
- 506 Smit, B., Harding, C.T., Hockey, P.A.R., and McKechnie, A.E. 2013. Adaptive thermoregulation  
507 during summer in two populations of an arid-zone passerine. *Ecology* **94**(5): 1142–1154.  
508 doi:10.1890/12-1511.1.
- 509 Smith, M.S., Horrocks, L., Harvey, A., and Hamilton, C. 2011. Rethinking adaptation for a 4 °C  
510 world. *Philos. Trans. R. Soc. A Math. Phys. Eng. Sci.* **369**(1934): 196–216.  
511 doi:10.1098/rsta.2010.0277.
- 512 Steyn, P. 1971. Notes on the breeding biology of the freckled nightjar. *Ostrich* **42**: 179–188.  
513 doi:10.1080/00306525.1971.9633405.
- 514 Tieleman, B.I., van Noordwijk, H.J., and Williams, J.B. 2008. Nest site selection in a hot desert:  
515 trade-off between microclimate and predation risk? *Condor* **110**(1): 116–124.  
516 doi:10.1525/cond.2008.110.1.116.116.
- 517 Tieleman, B.I., and Williams, J.B. 1999. The role of hyperthermia in the water economy of  
518 desert birds. *Physiol. Biochem. Zool.* **72**(1): 87–100. doi:10.1086/316640.

- 519 Tieleman, B.I., and Williams, J.B. 2002. Effects of food supplementation on behavioural  
520 decisions of hoopoe-larks in the Arabian desert: balancing water, energy and  
521 thermoregulation. *Anim. Behav.* **63**(3): 519–529. doi:10.1006/anbe.2001.1927.
- 522 Walsberg, G.E., and Weathers, W.W. 1986. A simple technique for estimating operative  
523 environmental temperature. *J. Therm. Biol.* **11**(1): 67–72. doi:10.1016/0306-  
524 4565(86)90020-3.
- 525 Walsberg, G.E., and Wolf, B.O. 1996. An appraisal of operative temperature mounts as tools for  
526 studies of ecological energetics. *Physiol. Zool.* **69**(3): 658–681.  
527 doi:10.1086/physzool.69.3.30164221.
- 528 Ward, D., and Pinshow, B. 1995. Temperature regulation of the great grey shrike (*Lanius*  
529 *excubitor*) in the Negev desert—II. Field measurements of standard operative temperatures  
530 and behaviour. *J. Therm. Biol.* **20**(3): 271–279. doi:10.1016/0306-4565(94)00051-J.
- 531 Watson, C.M., and Francis, G.R. 2015. Three dimensional printing as an effective method of  
532 producing anatomically accurate models for studies in thermal ecology. *J. Therm. Biol.* **51**:  
533 42–46. doi:10.1016/j.jtherbio.2015.03.004.
- 534 Weller, M. 1958. Observations on the incubation behavior of a common nighthawk. *Auk* **75**(1):  
535 48–59.
- 536 Williams, J.B., Tieleman, B.I., and Shobrak, M. 1999. Lizard burrows provide thermal refugia  
537 for larks in the Arabian desert. *Condor* **101**(3): 714–717. doi:10.2307/1370208.
- 538 Williams, S.E., Shoo, L.P., Isaac, J.L., Hoffmann, A.A., and Langham, G. 2008. Towards an  
539 integrated framework for assessing the vulnerability of species to climate change. *PLoS*  
540 *Biol.* **6**(12): e325. doi:10.1371/journal.pbio.0060325.
- 541 Wolf, B. 2000. Global warming and avian occupancy of hot deserts: a physiological and



- 542 behavioral perspective. *Rev. Chil. Hist. Nat.* **73**(3): 395–400. doi:10.4067/S0716-
- 543 078X2000000300003.
- 544 Wolf, B.O., and Walsberg, G.E. 1996. Thermal effects of radiation and wind on a small bird and
- 545 implications for microsite selection. *Ecology* **77**(7): 2228–2236. doi:10.2307/2265716.
- 546 Wolf, B.O., Wooden, K.M., and Walsberg, G.E. 1996. The use of thermal refugia by two small
- 547 desert birds. *Condor* **98**(2): 424–428. doi:10.2307/1369162.
- 548 Woods, C.P., and Brigham, R.M. 2008. Common poorwill activity and calling behavior in
- 549 relation to moonlight and predation. *Wilson J. Ornithol.* **120**(3): 505–512. doi:10.1676/06-
- 550 067.1.
- 551 Woods, H.A., Dillon, M.E., and Pincebourde, S. 2015. The roles of microclimatic diversity and
- 552 of behavior in mediating the responses of ectotherms to climate change. *J. Therm. Biol.* **54**:
- 553 86–97. doi:10.1016/j.jtherbio.2014.10.002.
- 554

555

556 **Table 1.** Mean  $\pm$  SD diurnal (i.e., sunrise to sunset), midday (i.e., 12:00 – 15:00 hours) and  
 557 maximum operative temperatures ( $T_e$  °C) recorded at six roost sites and one nest site used by six  
 558 different Rufous-cheeked Nightjars (*Caprimulgus rufigena*; roosts 1 and 2 were occupied by the  
 559 same individual).  $T_e$  was recorded at each site separately between 26 October and 12 December  
 560 2015, near Kimberly, South Africa at 1-minute intervals using two types of 3-D printed models,  
 561 including one type covered with skin and feathers (i.e., skin) and one without skin and feathers  
 562 (i.e., plastic). Sample sizes were identical between skin and plastic models, ranging from 2352 to  
 563 3497 for diurnal measurements and 543 to 806 for midday measurements. Values in parentheses  
 564 represent  $T_e$  ranges.

| Site    | Mean diurnal $T_e$               |                                  | Mean midday $T_e$               |                                 | Mean maximum $T_e$              |                                 |
|---------|----------------------------------|----------------------------------|---------------------------------|---------------------------------|---------------------------------|---------------------------------|
|         | Skin                             | Plastic                          | Skin                            | Plastic                         | Skin                            | Plastic                         |
| Roost 1 | 40.4 $\pm$ 11.4<br>(14.3 – 65.6) | 40.6 $\pm$ 12.6<br>(16.6 – 64.8) | 49.9 $\pm$ 7.6<br>(36.6 – 65.6) | 50.3 $\pm$ 7.1<br>(39.1 – 64.8) | 60.8 $\pm$ 6.0<br>(54.1 – 65.6) | 62.8 $\pm$ 2.9<br>(59.5 – 64.8) |
| Roost 2 | 37.0 $\pm$ 6.7<br>(13.9 – 53.5)  | 41.0 $\pm$ 9.4<br>(14.0 – 62.0)  | 41.4 $\pm$ 3.1<br>(38.3 – 53.5) | 41.4 $\pm$ 2.3<br>(37.2 – 52.4) | 48.1 $\pm$ 5.5<br>(40.5 – 53.5) | 58.3 $\pm$ 3.8<br>(53.0 – 62.0) |
| Roost 3 | 28.9 $\pm$ 6.2<br>(11.5 – 43.6)  | 29.2 $\pm$ 6.6<br>(10.9 – 44.7)  | 33.1 $\pm$ 3.3<br>(28.4 – 43.6) | 33.0 $\pm$ 3.7<br>(28.0 – 44.7) | 38.5 $\pm$ 4.6<br>(32.5 – 43.6) | 38.9 $\pm$ 5.2<br>(32.7 – 44.7) |
| Roost 4 | 38.3 $\pm$ 10.3<br>(10.2 – 55.5) | 37.8 $\pm$ 11.0<br>(8.3 – 55.5)  | 45.2 $\pm$ 3.6<br>(39.1 – 51.5) | 45.3 $\pm$ 5.4<br>(35.9 – 53.4) | 50.1 $\pm$ 4.8<br>(43.9 – 55.5) | 52.0 $\pm$ 5.5<br>(43.8 – 55.5) |
| Roost 5 | 31.0 $\pm$ 9.1<br>(6.6 – 48.7)   | 34.7 $\pm$ 10.8<br>(8.0 – 55.0)  | 36.5 $\pm$ 1.9<br>(31.5 – 42.1) | 38.1 $\pm$ 4.4<br>(28.8 – 47.2) | 43.0 $\pm$ 4.0<br>(39.9 – 48.7) | 50.0 $\pm$ 6.3<br>(41.5 – 55.0) |
| Roost 6 | 41.3 $\pm$ 11.7<br>(16.9 – 62.6) | 40.6 $\pm$ 12.1<br>(14.6 – 62.2) | 44.5 $\pm$ 7.3<br>(33.8 – 60.3) | 44.5 $\pm$ 7.3<br>(31.1 – 57.6) | 58.2 $\pm$ 4.7<br>(53.2 – 62.6) | 59.3 $\pm$ 2.7<br>(56.9 – 62.2) |
| Nest    | 41.0 $\pm$ 11.5<br>(15.4 – 60.4) | 40.6 $\pm$ 11.2<br>(15.0 – 62.0) | 51.4 $\pm$ 4.2<br>(44.5 – 60.4) | 51.1 $\pm$ 4.9<br>(42.1 – 62.0) | 55.1 $\pm$ 4.5<br>(49.5 – 60.4) | 56.0 $\pm$ 4.9<br>(50.0 – 62.0) |

565

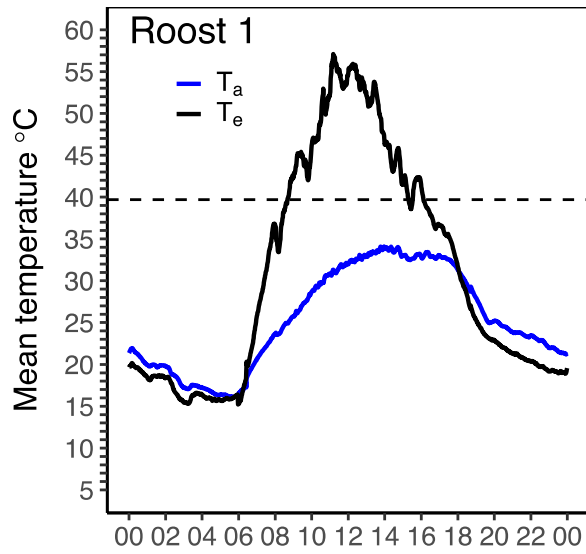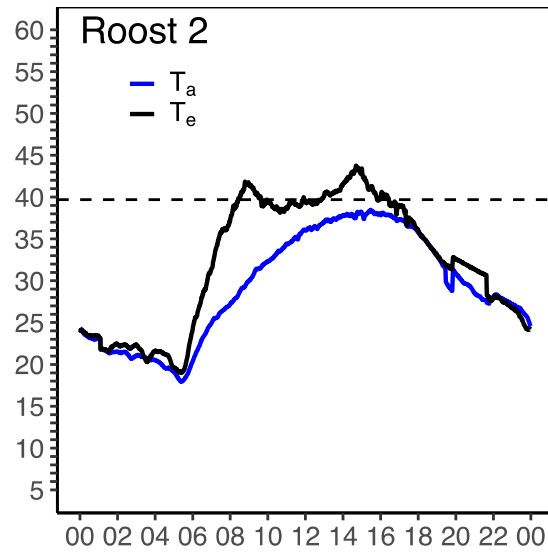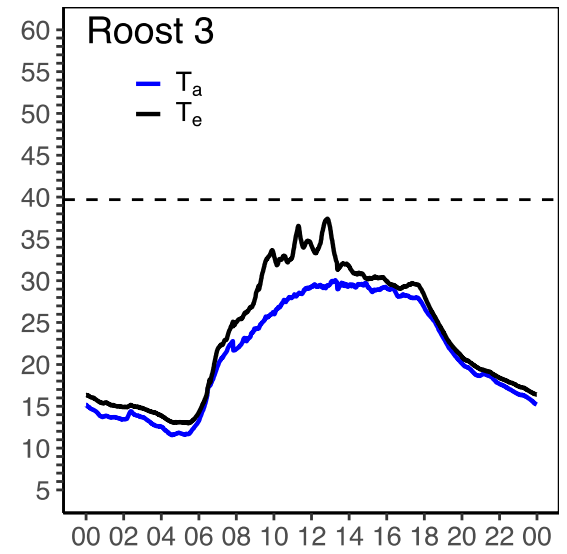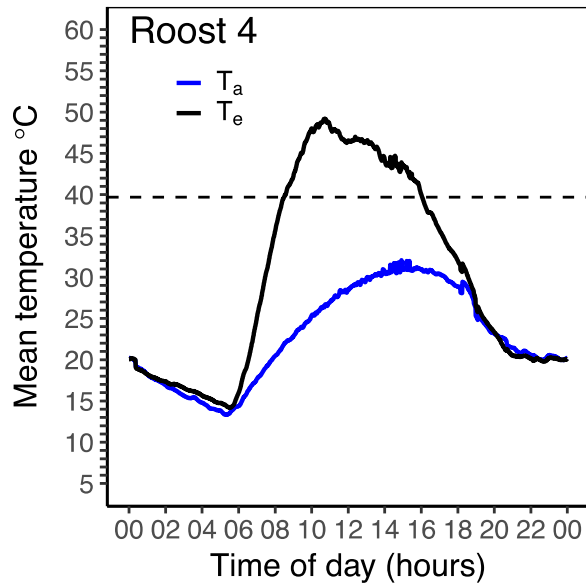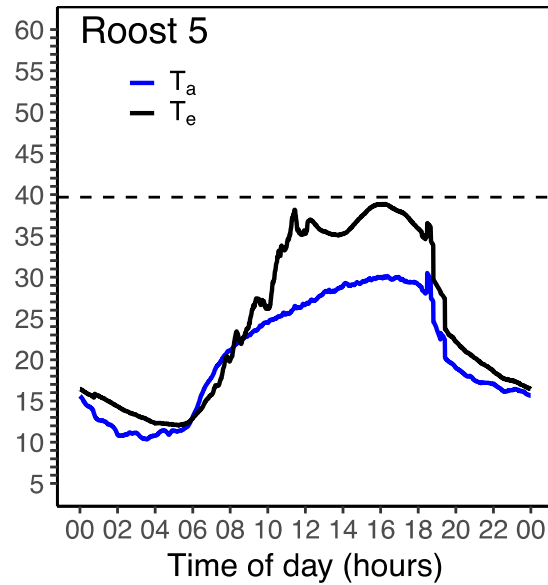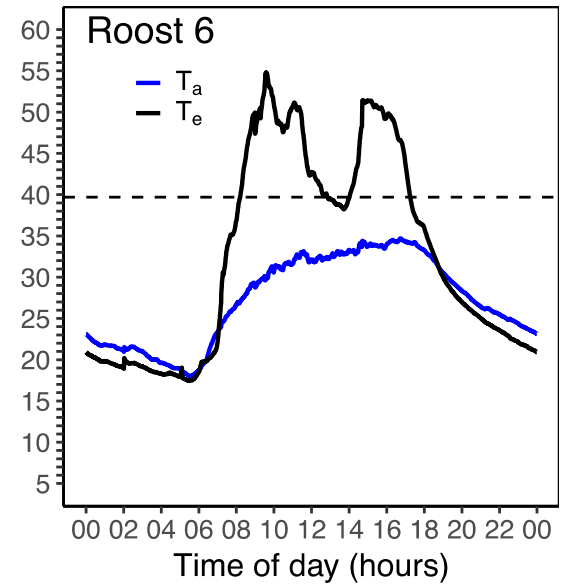

**Figure 2.** Mean operative temperature ( $T_e$ ) and air temperature ( $T_a$ ) for a 24-hour day (e.g., 02 = 02:00 hours; 22 = 22:00 hours) at six roost sites used by five Rufous-cheeked Nightjars (*Caprimulgus rufigena*; roosts 1 and 2 are from the same bird).  $T_e$  was recorded at 1-min intervals using a 3-D printed model covered with the skin and feathers of a Rufous-cheeked Nightjar.  $T_e$  was recorded at each roost site separately and remained at a site for approximately four days. Horizontal dashed lines represent free-ranging modal body temperature for roosting Rufous-cheeked Nightjars (39.7 °C; O'Connor et al. 2017a).  $T_a$  was also recorded at 1-minute intervals.

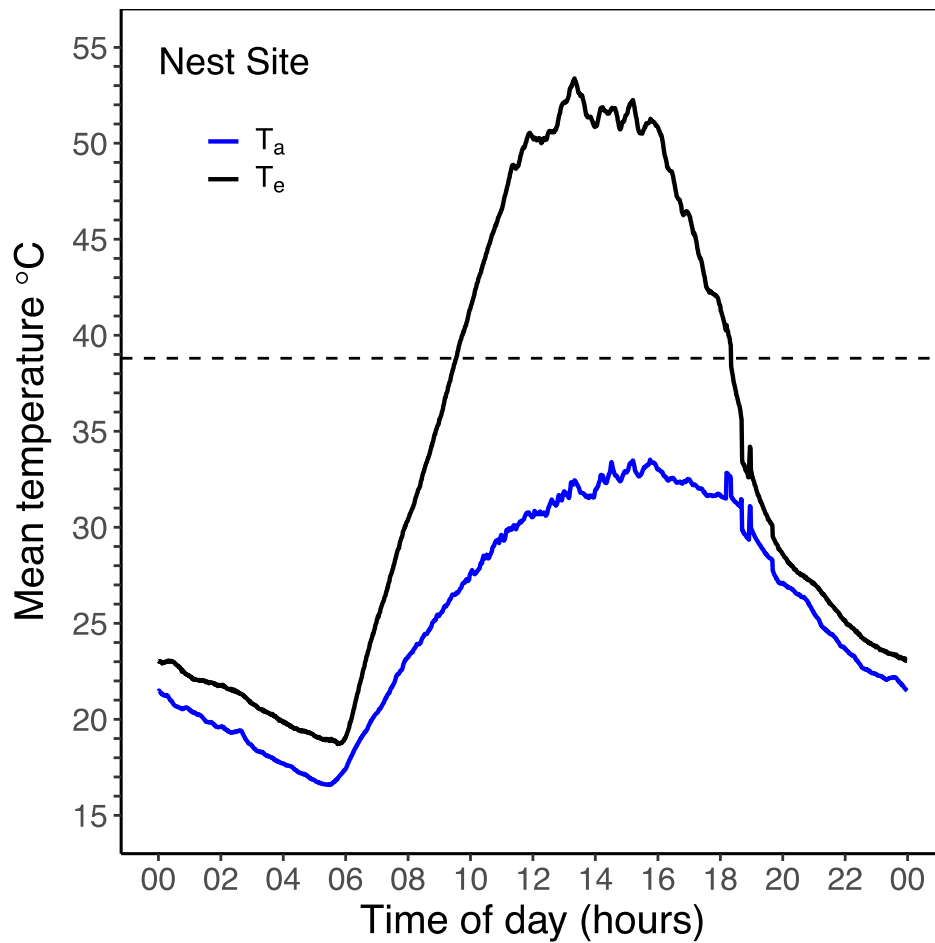

**Figure 3.** Mean operative temperature ( $T_e$ ) and air temperature ( $T_a$ ) for a 24-hour day (e.g., 02 = 02:00 hours; 22 = 22:00 hours) at a Rufous-cheeked Nightjar (*Caprimulgus rufigena*) nest site.  $T_e$  was recorded at 1-min intervals using a 3-D printed model covered with the skin and feathers of a Rufous-cheeked Nightjar. The model remained at the site for approximately four days. The horizontal dashed line represents the free-ranging modal body temperature for an incubating Rufous-cheeked Nightjar (38.8 °C; O'Connor et al. 2017a).  $T_a$  was also recorded at 1-minute intervals.

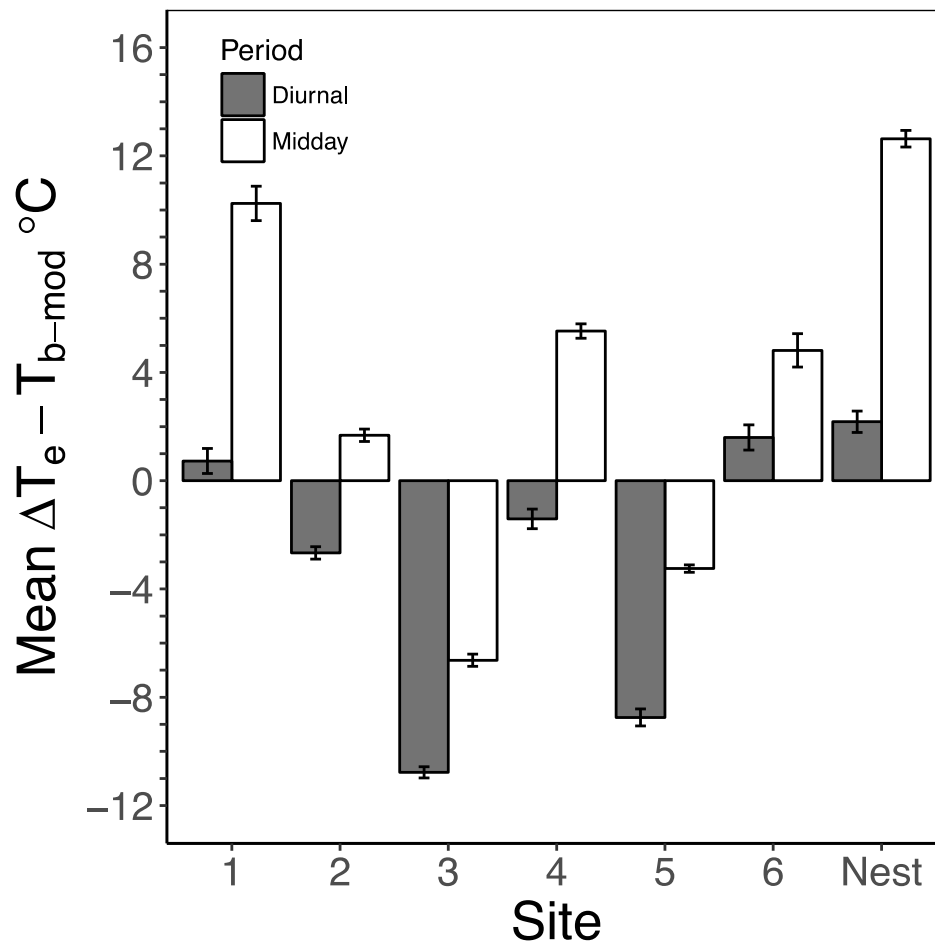

**Figure 4.** Mean difference between operative temperature ( $T_e$ ) and free-ranging modal body temperature ( $T_{b-mod}$ ) during the diurnal (i.e., sunrise to sunset) and midday (i.e., 12:00 – 15:00 hours) periods at six roost sites and one nest site used by six Rufous-cheeked Nightjars (*Caprimulgus rufigena*; roosts 1 and 2 are from the same individual).  $T_e$  was recorded at each site separately between 26 October and 12 December 2015, near Kimberly, South Africa at 1-minute intervals using a 3-D printed model covered with the skin and feathers of a Rufous-cheeked Nightjar. Error bars represent 95% confidence intervals.

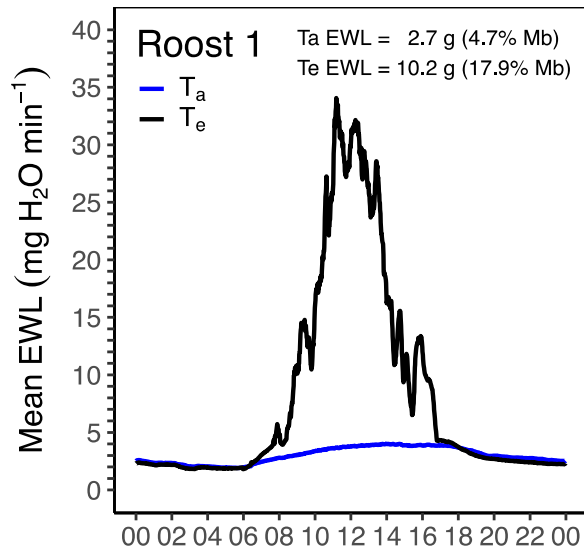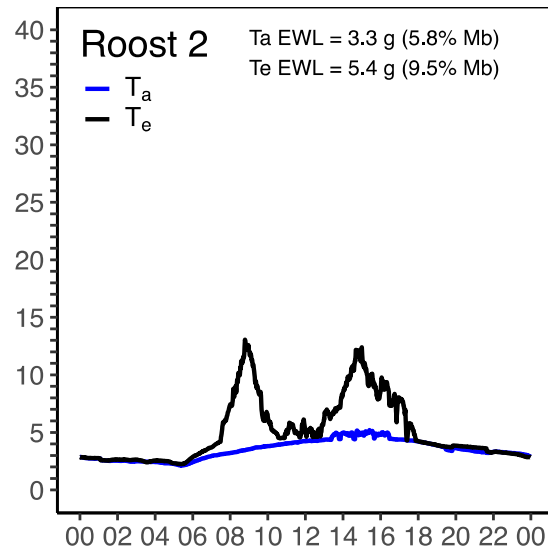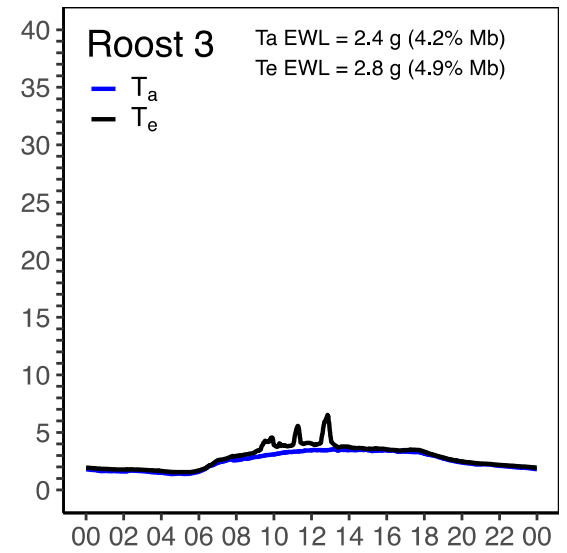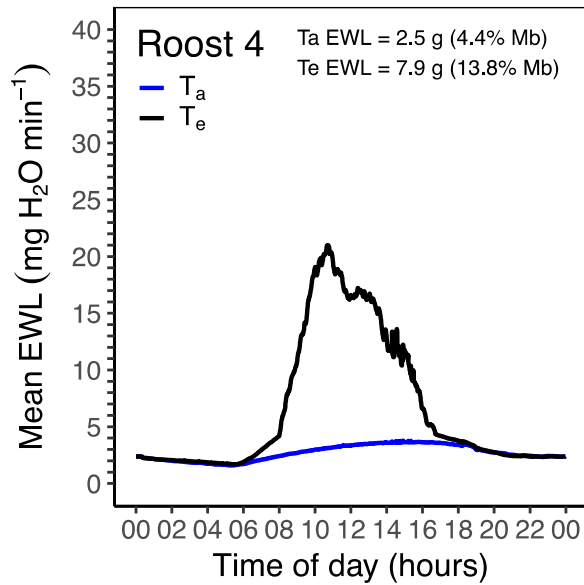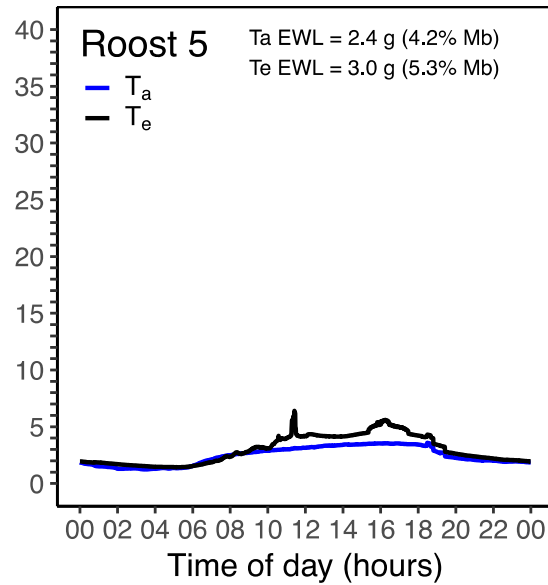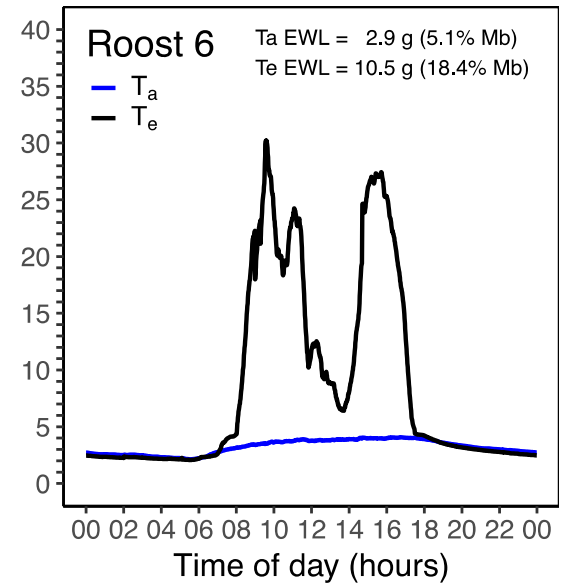

**Figure 5.** Mean evaporative water loss (EWL) predictions for a 24-hour day (e.g., 02 = 02:00 hours; 22 = 22:00 hours) at six roost sites used by five Rufous-cheeked Nightjars (*Caprimulgus rufigena*; roosts 1 and 2 were used by the same bird). EWL was predicted every minute by plugging either  $T_e$  or  $T_a$  into EWL models from O'Connor et al. (2017b).  $T_a$  EWL and  $T_e$  EWL represent the sum of all mean EWL predictions at each minute for only the diurnal period. Values in parentheses represent the amount of water lost during the diurnal period as a percentage of body mass (57.1 g).



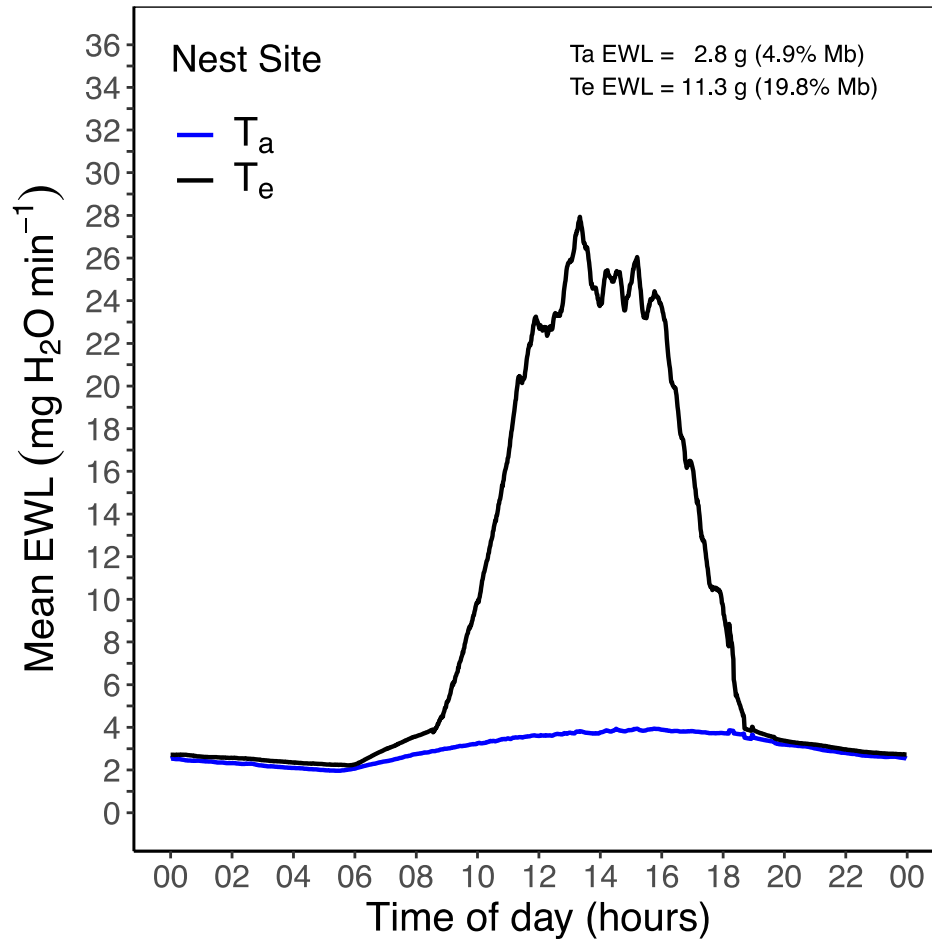

**Figure 6.** Mean evaporative water loss (EWL) predictions for a 24-hour day (e.g., 02 = 02:00 hours; 22 = 22:00 hours) for a Rufous-cheeked Nightjar (*Caprimulgus rufigena*) nest site. EWL was predicted every minute from T<sub>e</sub> or T<sub>a</sub> using EWL data from O'Connor et al. (2017b). T<sub>a</sub> EWL and T<sub>e</sub> EWL represent the sum of all mean EWL predictions at each minute for only the diurnal period. Values in parentheses represent the amount of water lost during the diurnal period as a percentage of mean Rufous-cheeked Nightjar body mass (57.1 g).
